# Supplementary material for: First Genome Sequences of Two Multidrug-Resistant Candida haemulonii var. vulnera Isolates From Pediatric Patients With Candidemia
Source: PubMed Central journal article supplement (PMC7350289; doi:10.3389/fmicb.2020.01535), 2020-07-03
Supplement: Data_Sheet_1.pdf [file Data_Sheet_1.pdf]

S1 TABLE. Isolates of the *Candida haemulonii* complex included in the phylogenetic analysis of internal transcribed spacers (ITS1 and ITS2) sequences

| <b>Isolate</b> | <b>GenBank accession no.</b> | <b>Species</b>                           |
|----------------|------------------------------|------------------------------------------|
| HCFMUSP01      | KT236448.1                   | <i>C. duobushaemulonii</i>               |
| HCFMUSP02      | KT968725.1                   | <i>C. duobushaemulonii</i>               |
| HCFMUSP03      | KT236449.1                   | <i>C. haemulonii</i> var. <i>vulnera</i> |
| HCFMUSP04      | KT968726.1                   | <i>C. duobushaemulonii</i>               |
| HCFMUSP05      | KT968713.1                   | <i>C. haemulonii</i>                     |
| HCFMUSP06      | KT968733.1                   | <i>C. haemulonii</i> var. <i>vulnera</i> |
| HCFMUSP07      | KT968734.1                   | <i>C. haemulonii</i> var. <i>vulnera</i> |
| HCFMUSP08      | KT968735.1                   | <i>C. haemulonii</i> var. <i>vulnera</i> |
| HCFMUSP09      | KT968714.1                   | <i>C. haemulonii</i>                     |
| HCFMUSP10      | KT257659.1                   | <i>C. haemulonii</i>                     |
| HCFMUSP11      | KT968727.1                   | <i>C. duobushaemulonii</i>               |
| HCFMUSP12      | KT968715.1                   | <i>C. haemulonii</i>                     |
| HCFMUSP13      | KT968716.1                   | <i>C. haemulonii</i>                     |
| HCFMUSP14      | KT968728.1                   | <i>C. duobushaemulonii</i>               |
| HCFMUSP15      | KT968729.1                   | <i>C. duobushaemulonii</i>               |
| HCFMUSP16      | KT968730.1                   | <i>C. duobushaemulonii</i>               |
| HCFMUSP17      | KT968717.1                   | <i>C. haemulonii</i>                     |
| HCFMUSP18      | KT968731.1                   | <i>C. duobushaemulonii</i>               |
| HCFMUSP19      | KT968718.1                   | <i>C. haemulonii</i>                     |
| HCFMUSP20      | KT968732.1                   | <i>C. duobushaemulonii</i>               |
| HCFMUSP21      | KT968719.1                   | <i>C. haemulonii</i>                     |
| HCFMUSP22      | KT968720.1                   | <i>C. haemulonii</i>                     |
| HCFMUSP23      | KT968721.1                   | <i>C. haemulonii</i>                     |
| HCFMUSP24      | KT968736.1                   | <i>C. haemulonii</i> var. <i>vulnera</i> |
| HCFMUSP25      | KT968737.1                   | <i>C. haemulonii</i> var. <i>vulnera</i> |
| HCFMUSP26      | KT968722.1                   | <i>C. haemulonii</i>                     |
| HCFMUSP27      | KT257660.1                   | <i>C. haemulonii</i>                     |
| HCFMUSP28      | KT968723.1                   | <i>C. haemulonii</i>                     |
| HCFMUSP29      | KT968738.1                   | <i>C. haemulonii</i> var. <i>vulnera</i> |
| HCFMUSP30      | KT968724.1                   | <i>C. haemulonii</i>                     |
| HCFMUSP31      | KT968739.1                   | <i>C. haemulonii</i> var. <i>vulnera</i> |
| HCFMUSP32      | KU365080.1                   | <i>C. duobushaemulonii</i>               |
| HCFMUSP33      | KU365081.1                   | <i>C. haemulonii</i> var. <i>vulnera</i> |
| IMT-USP01      | KX118598.1                   | <i>C. haemulonii</i> var. <i>vulnera</i> |

|           |            |                                          |
|-----------|------------|------------------------------------------|
| HCFMUSP34 | KX118599.1 | <i>C. haemulonii</i> var. <i>vulnera</i> |
| HCFMUSP35 | KX118600.1 | <i>C. duobushaemulonii</i>               |
| HCFMUSP36 | KX118601.1 | <i>C. haemulonii</i>                     |
| HCFMUSP37 | KX118602.1 | <i>C. haemulonii</i> var. <i>vulnera</i> |
| CBS5149T  | AB118789.1 | <i>C. haemulonii</i>                     |
| CBS7798T  | JX459666.1 | <i>C. duobushaemulonii</i>               |
| CBS7799   | JX459667.1 | <i>C. duobushaemulonii</i>               |
| CBS10004  | AB118791.1 | <i>C. pseudohaemulonii</i>               |
| KCTC17807 | JX459678.1 | <i>C. pseudohaemulonii</i>               |
| CBS12883  | KF689018.1 | <i>C. auris</i>                          |
| CBS12766  | KC692039.1 | <i>C. auris</i>                          |

---

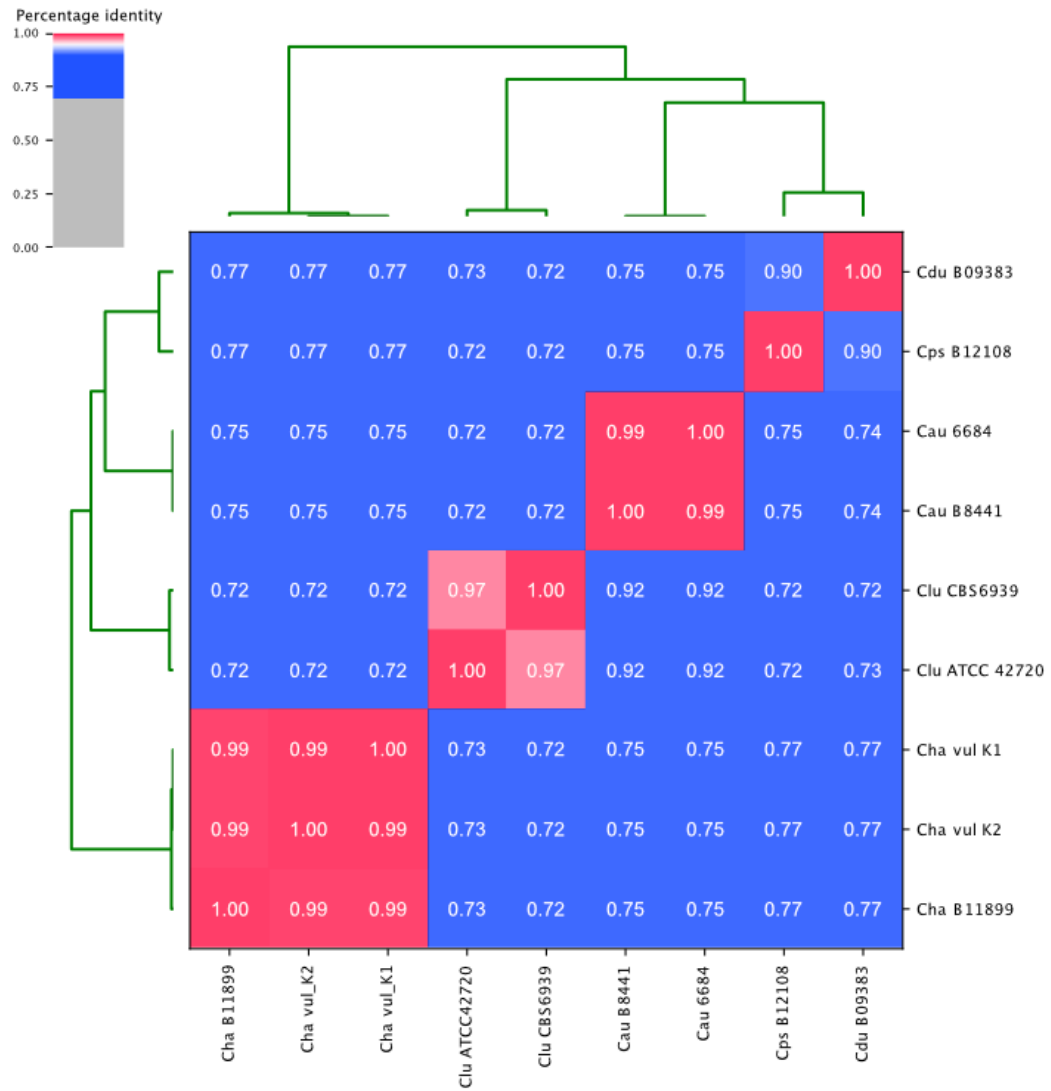

FIGURE S1. ANI analysis between *C. haemulonii* B11899, *C. haemulonii* var. *vulnera* (K2 and K1), *C. lusitaniae* (ATCC 427720 and CBS6939), *C. auris* (B8441 and 6684), *C. pseudohaemulonii* (B12108) and *C. duobushaemulonii* (B09383).

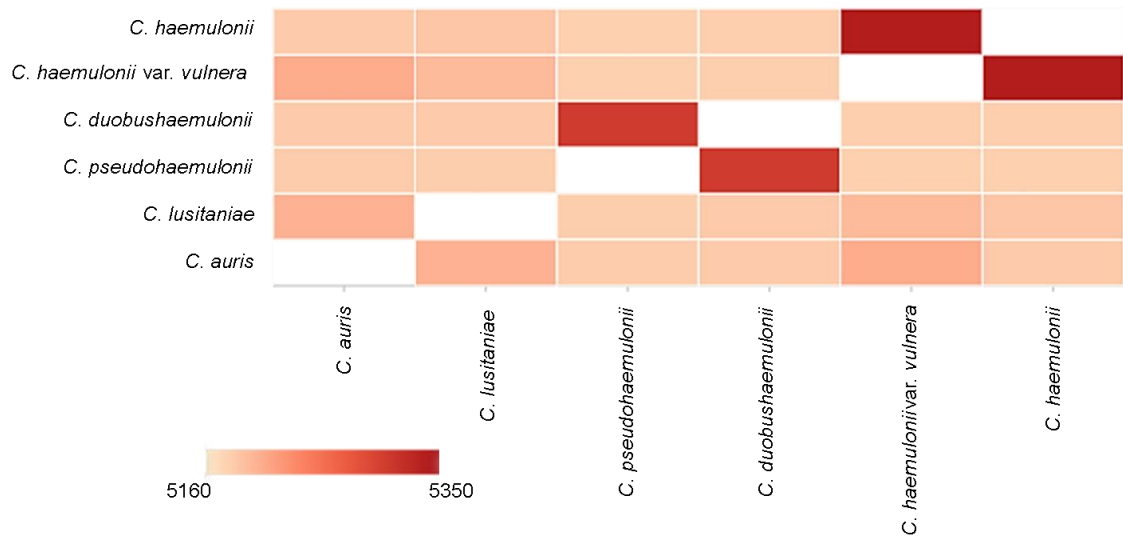

FIGURE S2. Heat map to visualize the intensity of overlapping clusters for the species in a pairwise fashion.
